# Supplementary material for: Functional and Mechanistic Characterization of an Enzyme Family Combining Bioinformatics and High-Throughput Microfluidics
Source: Research Square preprint supplement (doi:10.21203/rs.3.rs-1027271/v1), 2021-11-08
Supplement: Supplementary file 1 [file 19f23595333dd007ab4aa824.xls]

## Sheet: Selected genes
No.	Enzymes	Source organism		Sequence Annotation				Subfamily	Predicted catalytic pentad							Volume of active site [Å3]	Radii of transport tunnels p1/p2/p3 [Å]
		Organism	Kingdom	Salinity	Temperature	Biotic relationships	Disease-related		Nucleophile	Acid1	Acid2	Base	Halide1	Halide2	Halide3
1	DstA	Streptomyces turgidiscabies Car8	bacteria				common scab	HLD-I	D		D	H		W	W	586.81	0.72/0.50/-
2	DhmuA	Haloferax mucosum ATCC BAA-1512	archaea					HLD-III	D		D	H	N	W		617.28	0.63/0.43/0.59
3	DhliA	Halogeometricum limi	archaea					HLD-III	D		D	H	N	W		167.16	0.51/0.60/-
4	DtacA	Thalassomonas actiniarum	bacteria	moderate halophile	mesophile			HLD-I	D		D	H	Q	W	W	76.48	0.69/-/-
5	DfxA	Frankia sp. BMG5.36	bacteria					HLD-II	D	E		H	N	W		104.81	0.67/0.48/-
6	DpxA	Pseudovibrio sp. POLY-S9	bacteria			symbiont		HLD-II	D	E		H	N	W		1132.78	0.71/0.70/0.40
7	DlaA	Lechevalieria aerocolonigenes	bacteria					HLD-II	D	E		H	N	W		1365.07	0.89/0.59/-
8	DaxA	Amycolatopsis sp. ATCC 39116	bacteria					HLD-II	D	E		H	N	W		89.8	0.55/0.39/0.32
9	DsmA	Sulfitobacter mediterraneus KCTC 32188	bacteria					HLD-I	D		D	H		W	W	941.35	N/A
10	DmmarA	Mycobacterium marinum M	bacteria		mesophile		tuberculosis-like infection in fish, skin infection, arthritis in human	HLD-II	D	D		H	N	W		698.25	0.71/065/-
11	DathA	Amycolatopsis thermoflava	bacteria					HLD-II	D	E		H	N	W		1258.06	0.91/0.60/-
12	DmuA	Mycobacterium ulcerans Agy99	bacteria	non-halophile	mesophile		buruli ulcer	HLD-II	D	D		H	N	W		511.34	N/A
13	DmaA	Marine actinobacterium MedAcidi-G3	bacteria					HLD-II	D	E		H	N	W		781.61	0.91/0.62/0.41
14	DspoA	Sulfitobacter pontiacus 3SOLIMAR09	bacteria	moderate halophile	mesophile	free-living		HLD-II	D	E		H	N	W		N/A	N/A
15	DexA	Erythrobacter sp. NAP1	bacteria		mesophile			HLD-I	D		D	H		W	W	891.82	0.90/0.61/-
16	DppsA	Paraglaciecola psychrophila 170	bacteria	mesophile	psychrophile			HLD-I	D		D	H		W	W	957.13	0.87/0.84/-
17	DhsA	Halogranum salarium B-1	archaea	extreme halophile	mesophile			HLD-III	D		D	H	N	W		1453.16	0.69/0.78/-
18	DgarA	Gordonia araii NBRC 100433	bacteria					HLD-III	D		D	H	N	W		2365.57	0.84/0.76/0.61
19	DmgoA	Mycobacterium avium subsp. hominissuis TH135	bacteria	mesophile	mesophile	parasite	Mycobacterium avium complex disease	HLD-I	D		D	H		W	W	784.23	0.82/0.85/-
20	DnlA	Nocardioides lianchengensis	bacteria					HLD-I	D		D	H	Q	W	Y	363.12	N/A
21	DdsA	Desulfuromonas soudanensis	bacteria	moderate halophile	mesophile	free-living		HLD-III	D		D	H	N	W		369.01	0.81/0.69/0.50
22	DeaA	Ensifer adhaerens	bacteria					HLD-II	D	E		H	N	W		825.72	0.76/0.67/-
23	DmgaA	Marine gamma proteobacterium HTCC2080	bacteria					HLD-I	D		D	H	Q	W	W	3948.29	0.79/0.85/0.59
24	DprxA	Proteobacteria	multispecies					HLD-I	D		D	H		W	W	961.54	0.82/0.78/-
25	DrgA	Rhizobium gallicum	bacteria		mesophile	symbiont		HLD-II	D	E		H	N	W		599.81	0.65/0.55/0.30
26	DmbaA	Uncultured marine bacterium 311	archaea					HLD-II	D	E		H	N	W		980.42	0.86/0.46/-
27	DmmarB	Mycobacterium marinum M	bacteria		mesophile		tuberculosis-like infection in fish, skin infection, arthritis in human	HLD-II	D	E		H	N	W	Q	715.28	0.87/0.61/-
28	DthA	Trichoderma harzianum	eukaryota					HLD-II	D	E		H	N	W		198.01	N/A
29	DphxA	Phaeobacter sp. CECT 5382	bacteria					HLD-II	D	E		H	N	W		1430.94	0.79/0.74/-
30	DthB	Trichoderma harzianum	eukaryota					HLD-II	D	E		H	N	W		1213.93	N/A
31	DnbA	Nocardia brasiliensis ATCC 700358	bacteria		mesophile	parasite	mycetoma	HLD-II	D	E		H	N	W		933.24	0.72/0.67/-
32	DhxA	Hyphomonas sp. BRH_c22	bacteria					HLD-I	D		D	H	Q	W	W	521.06	0.77/0.61/-
33	DphexA	Phenylobacterium sp. SCN 70-31	bacteria					HLD-I	D		D	H		W	W	54.18	0.51/0.33/0.64
34	DspxA	Sphingomonas	multispecies					HLD-II	D	E		H	N	W		1007.93	0.86/0.56/-
35	DdpA	Desulfotalea psychrophila LSv54	bacteria		psychrophile			HLD-III	D		D	H	N	W	Y	2616.57	0.69/0.67/0.60
36	DrxA	Rhodococcus sp. EPR-157	bacteria					HLD-II	D	E		H	N	W	Q	2489.56	0.77/0.58/0.16
37	DchA	Candidatus Heimdallarchaeota archaeon LC_3	archaea					HLD-II	D	E		H	N	W		942.96	0.77/0.74/0.42
38	DmoxA	Moritella sp. PE36	bacteria		cryophile			HLD-III	D		D	H	N	W		150.29	0.69/0.46/-
39	DpproA	Photobacterium profundum 3TCK	bacteria	non-halophile	psychrophile			HLD-III	D		D	H	N	W		975.74	0.70/0.64/-
40	DshA	Shewanella halifaxensis HAW-EB4	bacteria		psychrophile			HLD-III	D		D	H	N	W		881.92	0.79/0.67/0.53
41	DcagA	Chloroflexus aggregans DSM 9485	bacteria		thermophile			HLD-III	D		D	H	N	W	W	1513.52	0.73/0.65/0.50
42	DctA	Capitella teleta	eukaryota					HLD-II	D	E		H	N	W		971.81	N/A
43	DskA	Saccoglossus kowalevskii	eukaryota					HLD-II	D	E		H	N	W		928.96	0.93/0.74/-
44	DspB	Strongylocentrotus purpuratus	eukaryota					HLD-II	D	E		H	N	W		1568	0.93/0.76/-
45	DbbA	Branchiostoma belcheri	eukaryota					HLD-II	D	E		H	N	W		1618.87	0.92/0.74/0.35
